# Supplementary material
Source: PubMed Central journal article supplement (PMC8661887)
Supplement: SIM-40-6197-s001.pdf [file SIM-40-6197-s001.pdf]

Supplementary material for:  
Avoiding bias in self-controlled case series studies  
of COVID-19

Oswaldo Fonseca-Rodríguez, Anne-Marie Fors Connolly,  
Ioannis Katsoularis, Krister Lindmark, Paddy Farrington

July 19, 2021

## 1 Preliminary and published data

Supplementary Table 1 contrasts the preliminary data used in this paper to the data eventually published in The Lancet.

Table 1: AMI and stroke: vital status and temporal relationship to COVID-19 in preliminary (Prelim) and published (Pub) data.

|                              | AMI data |     | Stroke data |     |
|------------------------------|----------|-----|-------------|-----|
|                              | Prelim   | Pub | Prelim      | Pub |
| Total cases                  | 176      | 186 | 247         | 254 |
| Died in observation period   | 36       | 36  | 72          | 72  |
| Events in 28 days pre-COVID  | 27       | 33  | 53          | 65  |
| Events on day of COVID       | 34       | 27  | 36          | 25  |
| Events in 28 days post-COVID | 32       | 36  | 42          | 41  |

## 2 Further comparison of standard and extended SCCS models

Supplementary Figures 1 and 2 repeat the simulations described in Section 3 of the main paper, with separate risk periods 1-7 days, 8-14 days and 15-28 days rather than the combined 1-28 day risk period.

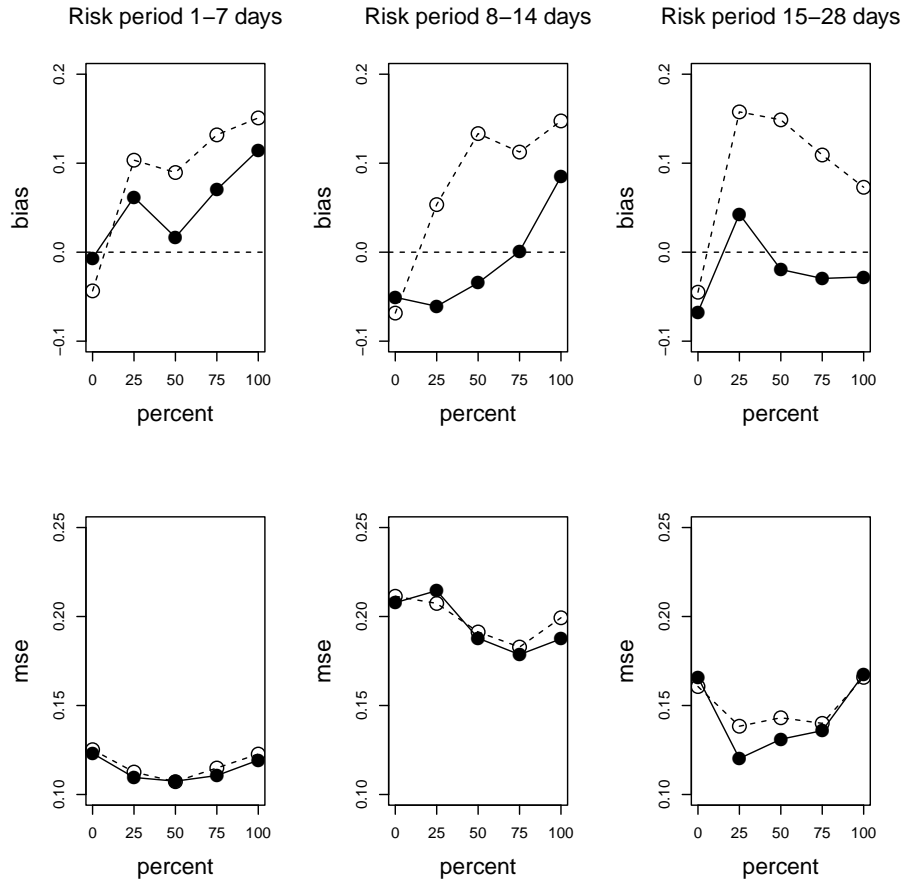

Figure 1: Bias (top row) and mean squared error (bottom row) of the log relative incidence of AMI for the 1-7, 8-14, and 15-28 day post-COVID-19 risk periods, by percentile of deaths attributed to the event. Circles: standard SCCS model. Full dots: extended SCCS model.

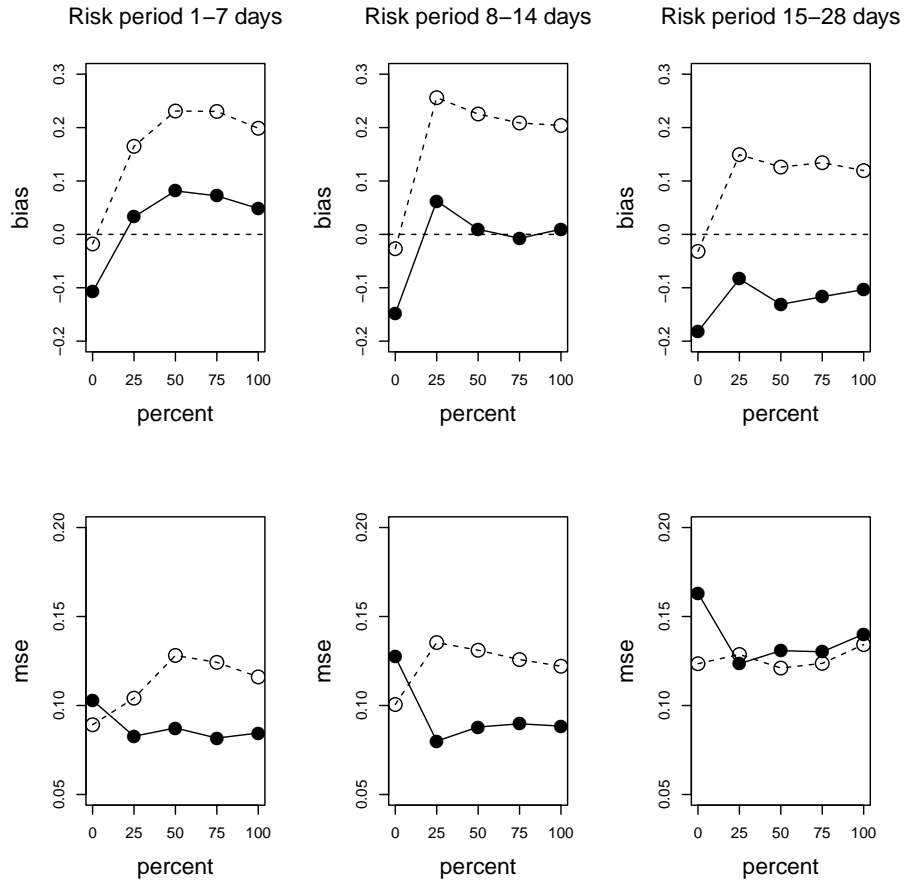

Figure 2: Bias (top row) and mean squared error (bottom row) of the log relative incidence of stroke for the 1-7, 8-14, and 15-28 day post-COVID-19 risk periods, by percentile of deaths attributed to the event. Circles: standard SCSS model. Full dots: extended SCSS model.
